# Supplementary material for: The (NH4)2CO3 exchange reaction and double-spike MC-ICP-MS method for gypsum U–Th dating
Source: Royal Society of Chemistry journal article supplement (doi:10.1039/d3ja00323j), 2023-12-22
Supplement: d3ja00323j1.pdf [file d3ja00323j1.pdf]

Supplementary Material for

**(NH<sub>4</sub>)<sub>2</sub>CO<sub>3</sub> exchange reaction and double-spike MC-ICP-MS  
method for gypsum U-Th dating**

Xuefeng Wang<sup>a,b\*</sup>, Lisheng Wang<sup>a,b</sup>, Zhibang Ma<sup>a</sup>, Yanhong Liu<sup>c</sup>, Wuhui Duan<sup>a</sup>, Ming  
Tan<sup>a</sup>, Jule Xiao<sup>a,b</sup>

<sup>a</sup> Key Laboratory of Cenozoic Geology and Environment, Institute of Geology and  
Geophysics, Chinese Academy of Sciences, Beijing 100029, China,

<sup>b</sup> College of Earth and Planetary Sciences, University of Chinese Academy of Sciences,  
Beijing 100049, China

<sup>c</sup> State Key Laboratory of Lithospheric Evolution, Institute of Geology and Geophysics,  
Chinese Academy of Sciences, Beijing 100029, China

**Table S1**

Certified mass fractions of six gypsum standards in this study

|                                    | GBW03109 | GBW03110 | GBW03111a | GYP-C | TIG-1 | FGD-1 |
|------------------------------------|----------|----------|-----------|-------|-------|-------|
| SiO <sub>2</sub> (%)               | 0.27     | 7.21     | 0.63      | 3.50  | 0.11  | 0.13  |
| Al <sub>2</sub> O <sub>3</sub> (%) | 0.02     | 1.92     | 0.14      | 0.79  | 0.57  | 0.02  |
| Fe <sub>2</sub> O <sub>3</sub> (%) | 0.02     | 0.63     | 0.11      | 0.40  | 0.26  | 0.01  |
| CaO(%)                             | 40.70    | 28.50    | 32.30     | 30.40 | 32.30 | 32.70 |
| MgO(%)                             | 1.02     | 4.92     | 2.47      | 5.35  | 0.12  | 0.01  |
| K <sub>2</sub> O(%)                | 0.02     | 0.38     | 0.03      | 0.36  | 0.01  | 0.01  |
| Na <sub>2</sub> O(%)               | 0.02     | 0.02     | 0.01      | 0.02  | 0.04  | 0.01  |
| TiO <sub>2</sub> (%)               | 0.00     | 0.10     | 0.01      | 0.04  | 0.82  | 0.01  |
| SO <sub>3</sub> (%)                | 55.63    | 32.55    | 40.72     | 33.00 | 43.40 | 46.40 |
| H <sub>2</sub> O(%)                | 0.17     | 14.27    | 17.95     | 14.37 | 20.30 | 20.70 |
| CO <sub>2</sub> (%)                | 2.17     | 8.63     | 5.44      | 11.20 | 1.41  | 0.02  |
| L.O.I(%)                           | 2.30     | 23.55    | 23.60     | 25.93 | 22.03 | 21.04 |
| Th( $\mu\text{g g}^{-1}$ )         |          |          |           | 0.52  | 2.14  | 0.03  |
| U( $\mu\text{g g}^{-1}$ )          |          |          |           | 0.72  | 2.50  |       |

**Table S2**

Measurement of gypsum/carbonate reaction efficiency ( $F_{[Ca]D}$  value) using different chemical processes

| condition                                                       | medium                                          | Ca (theoretical) | Ca(measured)  | $F_{[Ca]D}(\%)$ |
|-----------------------------------------------------------------|-------------------------------------------------|------------------|---------------|-----------------|
| R = 1:4, T = 1.5 h                                              | Na <sub>2</sub> CO <sub>3</sub>                 | 0.0234           | 0.0197        | 84.38           |
|                                                                 | duplicate 1                                     | 0.0234           | 0.0202        | 86.19           |
|                                                                 | duplicate 2                                     | <b>0.0234</b>    | <b>0.0199</b> | 84.99           |
|                                                                 | <b>average</b>                                  |                  |               | <b>85.19</b>    |
|                                                                 | K <sub>2</sub> CO <sub>3</sub>                  | 0.0237           | 0.0203        | 85.68           |
|                                                                 | duplicate 1                                     | 0.0234           | 0.0200        | 85.40           |
|                                                                 | duplicate 2                                     | <b>0.0235</b>    | <b>0.0201</b> | 85.38           |
|                                                                 | <b>average</b>                                  |                  |               | <b>85.49</b>    |
|                                                                 | (NH <sub>4</sub> ) <sub>2</sub> CO <sub>3</sub> | 0.0235           | 0.0212        | 90.11           |
|                                                                 | duplicate 1                                     | 0.0235           | 0.0207        | 88.18           |
|                                                                 | duplicate 2                                     | <b>0.0235</b>    | <b>0.0209</b> | 88.82           |
|                                                                 | <b>average</b>                                  |                  |               | <b>89.04</b>    |
| M = (NH <sub>4</sub> ) <sub>2</sub> CO <sub>3</sub> , T = 1.5 h | <b>molar ratio</b>                              | Ca (theoretical) | Ca(measured)  | $F_{[Ca]D}(\%)$ |
|                                                                 | <b>1:1.1</b>                                    | 0.0235           | 0.0172        | 73.43           |
|                                                                 | duplicate 1                                     | 0.0235           | 0.0171        | 72.88           |
|                                                                 | duplicate 2                                     | 0.0235           | 0.0169        | 72.07           |
|                                                                 | <b>average</b>                                  |                  |               | <b>72.79</b>    |
|                                                                 | <b>1:2</b>                                      | 0.0235           | 0.0185        | 78.97           |
|                                                                 | duplicate 1                                     | 0.0235           | 0.0190        | 80.65           |
|                                                                 | duplicate 2                                     | 0.0235           | 0.0181        | 77.18           |
|                                                                 | <b>average</b>                                  |                  |               | <b>78.94</b>    |
|                                                                 | <b>1:3</b>                                      | 0.0234           | 0.0189        | 80.55           |
|                                                                 | duplicate 1                                     | 0.0234           | 0.0186        | 79.43           |
|                                                                 | duplicate 2                                     | 0.0234           | 0.0191        | 81.61           |
|                                                                 | <b>average</b>                                  |                  |               | <b>80.53</b>    |
|                                                                 | <b>1:4</b>                                      | 0.0233           | 0.0203        | 87.13           |
|                                                                 | duplicate 1                                     | 0.0235           | 0.0203        | 86.35           |
|                                                                 | duplicate 2                                     | 0.0234           | 0.0201        | 85.88           |
|                                                                 | <b>average</b>                                  |                  |               | <b>86.46</b>    |
|                                                                 | <b>1:5</b>                                      | 0.0233           | 0.0199        | 85.71           |
|                                                                 | duplicate 1                                     | 0.0235           | 0.0202        | 85.97           |
|                                                                 | duplicate 2                                     | 0.0234           | 0.0205        | 87.59           |
|                                                                 | <b>average</b>                                  |                  |               | <b>86.42</b>    |
| R = 1:4, M = (NH <sub>4</sub> ) <sub>2</sub> CO <sub>3</sub>    | <b>time (h)</b>                                 | Ca (theoretical) | Ca(measured)  | $F_{[Ca]D}(\%)$ |
|                                                                 | <b>0.5</b>                                      | 0.0232           | 0.0171        | 73.71           |
|                                                                 | duplicate 1                                     | 0.0236           | 0.0165        | 70.06           |
|                                                                 | <b>average</b>                                  |                  |               | <b>71.88</b>    |
|                                                                 | <b>1</b>                                        | 0.0232           | 0.0183        | 79.07           |
|                                                                 | duplicate 1                                     | 0.0235           | 0.0184        | 78.41           |
| <b>average</b>                                                  |                                                 |                  | <b>78.74</b>  |                 |

|                |        |        |              |
|----------------|--------|--------|--------------|
| <b>1.5</b>     | 0.0235 | 0.0205 | 87.07        |
| duplicate 1    | 0.0235 | 0.0210 | 89.55        |
| <b>average</b> |        |        | <b>88.31</b> |
| <b>2</b>       | 0.0236 | 0.0220 | 93.18        |
| duplicate 1    | 0.0236 | 0.0229 | 97.30        |
| <b>average</b> |        |        | <b>95.24</b> |
| <b>4</b>       | 0.0235 | 0.0224 | 95.52        |
| duplicate 1    | 0.0235 | 0.0228 | 97.23        |
| <b>average</b> |        |        | <b>96.37</b> |
| <b>8</b>       | 0.0232 | 0.0220 | 94.85        |
| duplicate 1    | 0.0234 | 0.0228 | 97.42        |
| <b>average</b> |        |        | <b>96.14</b> |

---

R is the molar ratio of gypsum/carbonate

T is the reaction time

M is the carbonate medium

Table S3 The U-Th content,  $\delta^{234}\text{U}$ , and  $^{230}\text{Th}/^{238}\text{U}$  activity ratio values of FGD-1 gypsum standards using two different digestion processes.

| No | Sample        | $^{238}\text{U}$<br>(ng g <sup>-1</sup> ) | $^{232}\text{Th}$<br>(ng g <sup>-1</sup> ) | $\delta^{234}\text{U}$<br>(measured) | $^{230}\text{Th} / ^{238}\text{U}$<br>(activity) |
|----|---------------|-------------------------------------------|--------------------------------------------|--------------------------------------|--------------------------------------------------|
| 1  | FGD-1*        | 40.9 ±0.1                                 | 19.3 ±0.4                                  | -14.4 ±2.2                           | 4.398 ±0.028                                     |
| 2  | duplicate* 1  | 41.3 ±0.1                                 | 20.0 ±0.4                                  | -11.4 ±1.9                           | 4.337 ±0.027                                     |
| 3  | duplicate* 2  | 42.9 ±0.1                                 | 19.8 ±0.4                                  | -12.9 ±2.1                           | 4.293 ±0.029                                     |
| 4  | duplicate* 3  | 42.2 ±0.1                                 | 19.9 ±0.4                                  | -11.3 ±2.4                           | 4.350 ±0.031                                     |
| 5  | duplicate* 4  | 42.6 ±0.1                                 | 19.9 ±0.4                                  | -11.8 ±2.4                           | 4.273 ±0.029                                     |
| 6  | duplicate* 5  | 43.1 ±0.1                                 | 20.1 ±0.4                                  | -11.7 ±2.1                           | 4.270 ±0.027                                     |
| 1  | FGD-1#        | 41.0 ±0.1                                 | 19.6 ±0.4                                  | -13.5 ±2.9                           | 4.360 ±0.021                                     |
| 2  | duplicate# 1  | 43.0 ±0.1                                 | 20.3 ±0.4                                  | -12.5 ±2.1                           | 4.242 ±0.038                                     |
| 3  | duplicate# 2  | 41.7 ±0.1                                 | 20.0 ±0.5                                  | -15.1 ±2.1                           | 4.384 ±0.034                                     |
| 4  | duplicate# 3  | 41.9 ±0.1                                 | 20.4 ±0.4                                  | -14.3 ±2.0                           | 4.383 ±0.038                                     |
| 5  | duplicate# 4  | 43.0 ±0.1                                 | 20.0 ±0.4                                  | -12.1 ±2.2                           | <i>4.213 ±0.034</i>                              |
| 6  | duplicate# 5  | 42.6 ±0.1                                 | 20.0 ±0.4                                  | -11.8 ±4.5                           | 4.270 ±0.024                                     |
| 7  | duplicate# 6  | 41.2 ±0.0                                 | 19.3 ±0.4                                  | -11.7 ±1.6                           | 4.360 ±0.021                                     |
| 8  | duplicate# 7  | 41.2 ±0.0                                 | 19.2 ±0.4                                  | -11.7 ±1.6                           | 4.359 ±0.020                                     |
| 9  | duplicate# 8  | 42.3 ±0.1                                 | 20.3 ±0.5                                  | -10.5 ±2.5                           | 4.291 ±0.025                                     |
| 10 | duplicate# 9  | 41.8 ±0.1                                 | 19.6 ±0.4                                  | -13.9 ±2.7                           | 4.369 ±0.027                                     |
| 11 | duplicate# 10 | 40.4 ±0.1                                 | 19.3 ±0.5                                  | -10.8 ±2.7                           | 4.379 ±0.034                                     |
| 12 | duplicate# 11 | 42.4 ±0.1                                 | 19.8 ±0.4                                  | -13.0 ±2.8                           | 4.339 ±0.033                                     |
| 13 | duplicate# 12 | 41.6 ±0.1                                 | 19.7 ±0.4                                  | -15.2 ±2.7                           | 4.302 ±0.038                                     |
| 14 | duplicate# 13 | 41.5 ±0.1                                 | 19.7 ±0.4                                  | -14.9 ±2.8                           | 4.344 ±0.035                                     |
| 15 | duplicate# 14 | 41.3 ±0.1                                 | 19.6 ±0.4                                  | -12.3 ±3.1                           | 4.315 ±0.041                                     |
| 16 | duplicate# 15 | 41.7 ±0.1                                 | 19.6 ±0.4                                  | -12.5 ±2.9                           | 4.309 ±0.034                                     |
| 17 | duplicate# 16 | 41.6 ±0.1                                 | 19.4 ±0.4                                  | -11.1 ±3.1                           | 4.328 ±0.034                                     |
| 18 | duplicate# 17 | 40.4 ±0.1                                 | 19.3 ±0.4                                  | -10.4 ±3.0                           | 4.350 ±0.034                                     |
| 19 | duplicate# 18 | 41.5 ±0.1                                 | 19.5 ±0.4                                  | -10.4 ±3.1                           | 4.361 ±0.036                                     |
| 20 | duplicate# 19 | 41.7 ±0.1                                 | 19.4 ±0.5                                  | -13.9 ±2.9                           | 4.381 ±0.035                                     |
| 21 | duplicate# 20 | 40.7 ±0.1                                 | 20.1 ±0.5                                  | -11.6 ±3.7                           | 4.393 ±0.024                                     |
| 22 | duplicate# 21 | 40.0 ±0.1                                 | 19.4 ±0.4                                  | -13.1 ±3.6                           | 4.364 ±0.023                                     |
| 23 | duplicate# 22 | 41.9 ±0.1                                 | 20.5 ±0.5                                  | -10.2 ±2.1                           | 4.395 ±0.031                                     |
| 24 | duplicate# 23 | 42.1 ±0.1                                 | 20.2 ±0.5                                  | -11.6 ±2.6                           | 4.276 ±0.034                                     |
| 25 | duplicate# 24 | 40.8 ±0.1                                 | 20.0 ±0.6                                  | -10.5 ±2.4                           | 4.313 ±0.022                                     |
| 26 | duplicate# 25 | 41.9 ±0.1                                 | 19.3 ±0.6                                  | -12.8 ±2.6                           | <i>4.229 ±0.022</i>                              |
| 27 | duplicate# 26 | 41.3 ±0.1                                 | 20.2 ±0.6                                  | -15.0 ±3.0                           | 4.293 ±0.028                                     |
| 28 | duplicate# 27 | 42.6 ±0.1                                 | 19.8 ±0.6                                  | -11.8 ±2.6                           | 4.342 ±0.023                                     |
| 29 | duplicate# 28 | 40.2 ±0.1                                 | 19.7 ±0.6                                  | -11.6 ±2.5                           | 4.372 ±0.022                                     |
| 30 | duplicate# 29 | 40.2 ±0.1                                 | 19.8 ±0.5                                  | -14.9 ±3.4                           | 4.353 ±0.026                                     |
| 31 | duplicate# 30 | 40.1 ±0.1                                 | 19.8 ±0.4                                  | -12.3 ±3.2                           | 4.375 ±0.029                                     |
| 32 | duplicate# 31 | 41.5 ±0.1                                 | 20.4 ±0.4                                  | -13.0 ±3.2                           | 4.338 ±0.026                                     |
| 33 | duplicate# 32 | 41.3 ±0.2                                 | 20.3 ±0.4                                  | -10.6 ±4.0                           | 4.315 ±0.030                                     |

|    |               |           |           |            |              |
|----|---------------|-----------|-----------|------------|--------------|
| 34 | duplicate# 33 | 40.4 ±0.1 | 20.0 ±0.4 | -14.5 ±3.3 | 4.334 ±0.028 |
| 35 | duplicate# 34 | 40.6 ±0.1 | 20.1 ±0.4 | -12.0 ±4.7 | 4.375 ±0.033 |
| 36 | duplicate# 35 | 41.4 ±0.1 | 20.1 ±0.4 | -11.8 ±4.0 | 4.267 ±0.030 |
| 37 | duplicate# 36 | 40.0 ±0.1 | 19.5 ±0.4 | -10.4 ±3.4 | 4.326 ±0.028 |
| 38 | duplicate# 37 | 39.9 ±0.1 | 19.5 ±0.4 | -11.8 ±3.1 | 4.299 ±0.029 |
| 39 | duplicate# 38 | 39.5 ±0.2 | 19.6 ±0.4 | -14.2 ±4.7 | 4.282 ±0.032 |
| 40 | duplicate# 39 | 40.3 ±0.1 | 19.3 ±0.4 | -14.6 ±3.6 | 4.291 ±0.033 |
| 41 | duplicate# 40 | 40.8 ±0.1 | 19.9 ±0.4 | -12.7 ±3.5 | 4.324 ±0.028 |
| 42 | duplicate# 41 | 39.6 ±0.1 | 19.4 ±0.4 | -15.5 ±3.5 | 4.276 ±0.027 |
| 43 | duplicate# 42 | 40.4 ±0.1 | 19.1 ±0.4 | -14.1 ±3.0 | 4.263 ±0.030 |

FGD-1\* and duplicates\* are the gypsum samples treated with the dilute HCl digestion method.

FGD-1# and duplicates# are the gypsum samples treated with the (NH<sub>4</sub>)<sub>2</sub>CO<sub>3</sub> exchange reaction method.

The <sup>230</sup>Th/<sup>238</sup>U activity ratio in grey italic font represents the outliers, which were not used in the calculation of the average value.
